# Supplementary material
Source: PubMed Central journal article supplement (PMC6454546)
Supplement: NIHMS737541-supplement-supplemental.pdf [file NIHMS737541-supplement-supplemental.pdf]

# Bicyclic Brominated Furanones: A New Class of Quorum Sensing Modulators that Inhibit Bacterial Biofilm Formation

Sijie Yang,<sup>1</sup> Osama A. Abdel-Razek,<sup>2</sup> Fei Cheng,<sup>1</sup> Debjyoti Bandyopadhyay,<sup>1</sup> Gauri S. Shetye,<sup>1</sup>  
Guirong Wang,<sup>2\*</sup> and Yan-Yeung Luk<sup>1,3\*</sup>

<sup>1</sup>Department of Chemistry, Syracuse University, Syracuse, New York 13244; <sup>2</sup>Department of Surgery, Upstate Medical University, State University of New York, Syracuse, New York 13210;

<sup>3</sup>Department of Biomedical and Chemical Engineering, Syracuse University, Syracuse, New York 13244.

Email: [yluk@syr.edu](mailto:yluk@syr.edu); [wangg@upstate.edu](mailto:wangg@upstate.edu)

## Supporting information

### Table of contents

| Contents                                                       | Page |
|----------------------------------------------------------------|------|
| <b>Part 1: Chemical Synthesis</b>                              | S3   |
| Chemicals                                                      | S3   |
| General procedure for synthesis                                | S3   |
| <sup>1</sup> H NMR spectra of BBFs                             | S8   |
| <b>Part 2: Biological activities study</b>                     | S14  |
| Bacteria strains and growth media                              | S14  |
| Stock solutions of brominated furanones                        | S14  |
| Confocal laser scanning microscopy (CLSM) analysis of biofilms | S14  |
| Crystal violet biofilm assay in 96-well plates                 | S15  |
| Effect on growth of planktonic bacteria                        | S16  |
| Reporter gene assay for <i>P. aeruginosa</i>                   | S16  |
| Production of elastase B                                       | S17  |

|                                                                                                                           |     |
|---------------------------------------------------------------------------------------------------------------------------|-----|
| Cytotoxicity assay for human cells                                                                                        | S19 |
| Statistic analysis                                                                                                        | S19 |
| Effect of 400 $\mu$ M BF4 on biofilm formation by <i>P. aeruginosa</i> strain PA01-GFP (Fig S1)                           | S19 |
| Effect of brominated furanones on the biofilm formation by <i>E.coli</i> RP437 (pRSH103) (Fig S2)                         | S20 |
| Quantification of biofilm formation by <i>E.coli</i> RP437 (pRSH103) in the presence of 200 $\mu$ M BBFs and BF8 (Fig S3) | S20 |
| Dose-response curve of <i>Pseudomonas</i> biofilm formation in the presence of BBFs (Fig S4)                              | S21 |
| Effect of 200 $\mu$ M BBFs or BF8 on the growth of <i>E. coli</i> RP437 (Fig S5)                                          | S22 |
| Antagonistic activity of BBFs to <i>las</i> QS circuit in PAO-JP2 ( <i>plasI</i> -LVAgfp) (Fig S6)                        | S22 |
| Agonistic activity of BBFs to <i>rhl</i> QS circuit in PAO1 ( <i>prhII</i> -LVAgfp) (Fig S7)                              | S23 |
| Agonistic activity of BBFs to <i>rhl</i> QS circuit in PAO-JP2 ( <i>prhII</i> -LVAgfp) (Fig S8)                           | S23 |
| Effects of BBFs on the expression of elastase B by <i>P. aeruginosa</i> PAO-JP2 (Fig S9)                                  | S24 |
| Survival % of SK-N-SH in the presence of 100 $\mu$ M BBFs (Figure S10)                                                    | S24 |
| References                                                                                                                | S25 |

## Part 1: Chemical Synthesis

Chemicals. Minimum essential medium with Eagle's salts and L-glutamine (EMEM) was obtained from Mediatech (Herndon, VA). Trypan blue stain was purchased from Sigma-Aldrich (Milwaukee, WI). Cell counting kit 8 (CCK-8) was purchased from Dojindo Molecular Technologies, Inc. (Gaithersburg, MD). Water used for preparing all buffers and solutions had resistivity of 18 M $\Omega$  cm (Millipore, Billerica, MA).

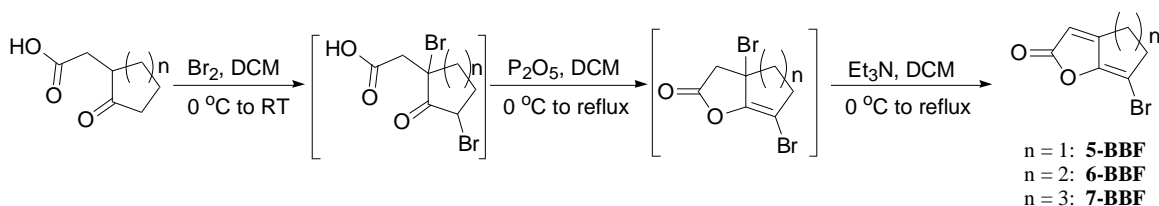

General procedure for synthesis: All air sensitive reactions were performed in oven dried glassware under an atmosphere of argon unless otherwise notified. All reagent grade starting materials were obtained from commercial supplies and used as received. Anhydrous solvents were purchased from Sigma-Aldrich. Analytical thin layer chromatography was performed on EM silica gel 60 F254 glass plates (0.25 mm). Visualization of analytical thin layer chromatography was achieved using UV absorbance (254 nm),  $\text{KMnO}_4$ , and ceric ammonium molybdate stains. Flash column chromatography was performed using SiliaFlash P60 silica gel (40-60  $\text{\AA}$ ) from SiliCycle, Inc.  $^1\text{H}$  and  $^{13}\text{C}$  NMR spectra were recorded on a Bruker Advance DPX-300 spectrometer. Chemical shifts are reported in ppm, using tetramethylsilane as the internal standard. Mass spectra were measured using a MAT 95 XP mass spectrometer, carried out by the Mass Spectroscopy Facility at Indiana University.

**5-BBF:** Bromine (0.79 mL, 15 mmol) was added dropwise to a solution of 2-oxocyclopentaneacetic acid (1.13 g, 7.69 mmol) in anhydrous methylene chloride (7.7 mL) at  $0^\circ\text{C}$ . The reaction mixture was stirred at  $0^\circ\text{C}$  for 40 min and then ambient temperature for 100 min.

The resulting solution was washed with water (10 mL) followed by aqueous 1M Na<sub>2</sub>S<sub>2</sub>O<sub>3</sub> solution (10 mL) and then extracted with methylene chloride (10 mL x 3). The combined organic layer was dried over MgSO<sub>4</sub>, filtered and concentrated under reduced pressure. The crude oil was taken up in anhydrous methylene chloride (30 mL) and cooled to 0 °C, followed by addition of P<sub>2</sub>O<sub>5</sub> (2.65 g, 18.6 mmol) in portions. The reaction mixture was stirred at 0 °C for 30 min, allowed to warm to ambient temperature and then stirred under reflux for 2 h. The solid thus formed was filtered off and the filtrate concentrated under reduced pressure. The crude oil was dissolved in anhydrous methylene chloride (15 mL), cooled to 0 °C and treated with anhydrous Et<sub>3</sub>N (1.12 mL, 8.0 mmol). The reaction mixture was stirred at ambient temperature for 30 min and then under reflux for 2 h. After cooled to ambient temperature, the reaction mixture was washed with aqueous saturated NH<sub>4</sub>Cl and extracted with methylene chloride (10 mL x 3). The combined organic layer was dried over MgSO<sub>4</sub>, filtered and concentrated under reduced pressure. Flash chromatography (SiO<sub>2</sub>, hexane:ethyl acetate, gradient) provided **5-BBF** (54.3 mg, 3% over 3 steps) as off white solid. TLC R<sub>f</sub> = 0.29 (hexane:ethyl acetate, 4:1). <sup>1</sup>H NMR (300 MHz, CDCl<sub>3</sub>): δ<sub>H</sub> 5.67 (t, 1H, *J* = 0.9 Hz), 3.12 (t, 2H, *J* = 4.2 Hz), 2.95 (td, 2H, *J* = 3.9, 1.5 Hz); <sup>13</sup>C NMR (75 MHz, CDCl<sub>3</sub>): δ<sub>C</sub> 173.0, 167.0, 153.3, 105.5, 105.0, 39.8, 24.7. HRMS (ESI<sup>+</sup>): Calcd. for M<sup>+</sup>: 199.9467, found: 199.9466 (96.3%), 201.9442 (100.0%).

**6-BBF**: To a mixture of ethyl 2-cyclohexaneacetate (2.00 g, 10.6 mmol) in THF (72 mL) and water (32 mL) was added lithium hydroxide (688.0 mg, 34.4 mmol). The reaction mixture was stirred vigorously at ambient temperature overnight. The reaction mixture was concentrated to remove THF and acidified with hydrochloric acid until pH was one. The mixture was extracted with ethyl acetate (30 mL x 3), washed with brine, dried over MgSO<sub>4</sub>, filtered and concentrated under reduced pressure. 2-Oxocyclohexaneacetic acid **1** was obtained as a light yellow crude oil that was carried

on to the next step without further purification. Bromine (1.14 mL, 22.3 mmol) was added dropwise to a solution of crude 2-oxocyclohexanecarboxylic acid **1** (1.65 g, 10.6 mmol) in anhydrous methylene chloride (10.6 mL) at 0 °C. The reaction mixture was stirred at 0 °C for 30 min and then ambient temperature for 2 h. The resulting solution was washed with water (6 mL) followed by aqueous 1M Na<sub>2</sub>S<sub>2</sub>O<sub>3</sub> solution (6 mL) and then extracted with methylene chloride (6 mL x 3). The combined organic layer was dried over MgSO<sub>4</sub>, filtered and concentrated under reduced pressure. The crude oil was taken up in anhydrous methylene chloride (42 mL) and cooled to 0 °C, followed by addition of P<sub>2</sub>O<sub>5</sub> (3.67 g, 25.9 mmol) in portions. The reaction mixture was stirred at 0 °C for 30 min, allowed to warm to ambient temperature and then stirred under reflux for 2 h. The solid thus formed was filtered off and the filtrate concentrated under reduced pressure. The crude oil was dissolved in anhydrous methylene chloride (26 mL), cooled to 0 °C and treated with anhydrous Et<sub>3</sub>N (1.50 mL, 10.8 mmol). The reaction mixture was stirred at ambient temperature for 30 min and then under reflux for 1 h. After cooled to ambient temperature, the reaction mixture was washed with aqueous saturated NH<sub>4</sub>Cl and extracted with methylene chloride (18 mL x 3). The combined organic layer was dried over MgSO<sub>4</sub>, filtered and concentrated under reduced pressure. Flash chromatography (SiO<sub>2</sub>, hexane:ethyl acetate, gradient) provided **6-BBF** (350.5 mg, 16% over 4 steps) as off white solid. TLC R<sub>f</sub> = 0.66 (hexane:ethyl acetate, 1:1). <sup>1</sup>H NMR (300 MHz, CDCl<sub>3</sub>): δ<sub>H</sub> 5.83 (s, 1H), 2.79 (t, 2H, *J* = 6.0 Hz), 2.73 (td, 2H, *J* = 6.0, 1.2 Hz), 2.00 (m, 2H); <sup>13</sup>C NMR (75 MHz, CDCl<sub>3</sub>): δ<sub>C</sub> 168.5, 154.9, 148.3, 111.0, 107.4, 34.0, 24.0, 23.6. HRMS (ESI<sup>+</sup>): Calcd. for M<sup>+</sup>: 213.9624, found: 213.9626 (100.0%), 215.9596 (99.6%).

**7-BBF**: To a stirred suspension of NaH (5.10 g, 60% suspension in mineral oil, 128 mmol, 15 mL x 2 hexane washed) in anhydrous benzene (80 mL) was added dimethyl carbonate (7.6 mL, 90 mmol) via syringe. The reaction was stirred under reflux for 1 h. A solution of cycloheptanone

(4.3 mL, 36 mmol) in anhydrous benzene (6.0 mL) was then added via cannula and the reaction mixture was stirred under reflux for 3 h. The heterogeneous mixture was cooled to ambient temperature and then quenched with acetic acid (8 mL). The mixture was diluted with water (200 mL), extracted with ethyl acetate (50 mL x 4), washed with brine, dried over MgSO<sub>4</sub>, filtered and concentrated under reduced pressure. Methyl 2-oxo-1-cycloheptanecarboxylate **2** was obtained as yellow oil that was carried on to the next step without further purification. To a solution of crude methyl 2-oxo-1-cycloheptanecarboxylate **2** in acetone (100 mL) was added potassium carbonate (23.2 g, 168 mmol) followed by ethyl bromoacetate (3.8 mL, 34 mmol). The reaction mixture was stirred under reflux overnight (~17 h). The suspension was cooled to ambient temperature and concentrated under reduced pressure to remove ~ half of the acetone. The residue was diluted with water (50 mL), extracted with diethyl ether (50 mL x 3), washed with brine, dried over MgSO<sub>4</sub>, filtered and concentrated under reduced pressure. The resulting yellow oil was treated with a solution of hydrochloric acid (27 mL, 6M) and acetic acid (27 mL). The reaction mixture was stirred under reflux for 2 days and cooled to ambient temperature. The mixture was diluted with water (50 mL), extracted with methylene chloride (30 mL x 5), washed with brine, dried over MgSO<sub>4</sub>, filtered and concentrated under reduced pressure. Flash chromatography (SiO<sub>2</sub>, methylene chloride:ethyl acetate, gradient) provided 2-oxocycloheptanecetic acid **3** (5.35 g, 87% over 3 steps) as a light yellow oil. TLC R<sub>f</sub> = 0.31 (methylene chloride:ethyl acetate, 1:1). The identity of this compound was confirmed by comparing <sup>1</sup>H NMR data with that previously reported.<sup>1</sup> Bromine (0.93 mL, 18 mmol) was added dropwise to a solution of 2-oxocycloheptanecetic acid **3** (1.47 g, 8.66 mmol) in anhydrous methylene chloride (8.7 mL) at 0 °C. The reaction mixture was stirred at 0 °C for 30 min and then ambient temperature for 2 h. The resulting solution was washed with water (5 mL) followed by aqueous 1M Na<sub>2</sub>S<sub>2</sub>O<sub>3</sub> solution (5 mL) and then extracted with methylene

chloride (5 mL x 3). The combined organic layer was dried over MgSO<sub>4</sub>, filtered and concentrated under reduced pressure. The crude oil was taken up in anhydrous methylene chloride (35 mL) and cooled to 0 °C, followed by addition of P<sub>2</sub>O<sub>5</sub> (3.00 g, 21.1 mmol) in portions. The reaction mixture was stirred at 0 °C for 40 min, allowed to warm to ambient temperature and then stirred under reflux for 2 h. The solid thus formed was filtered off and the filtrate concentrated under reduced pressure. The crude oil was dissolved in anhydrous methylene chloride (22 mL), cooled to 0 °C and treated with anhydrous Et<sub>3</sub>N (1.50 mL, 8.93 mmol). The reaction mixture was stirred at ambient temperature for 30 min and then under reflux for 1 h. After cooled to ambient temperature, the reaction mixture was washed with aqueous saturated NH<sub>4</sub>Cl and extracted with methylene chloride (15 mL x 3). The combined organic layer was dried over MgSO<sub>4</sub>, filtered and concentrated under reduced pressure. Flash chromatography (SiO<sub>2</sub>, hexane:ethyl acetate, gradient) provided **7-BBF** (194.8 mg, 10% over 3 steps) as off white solid. TLC R<sub>f</sub> = 0.62 (hexane:ethyl acetate, 1:1). <sup>1</sup>H NMR (300 MHz, CDCl<sub>3</sub>): δ<sub>H</sub> 6.01 (s, 1H), 2.98 (t, 2H, *J* = 6.0 Hz), 2.82 (td, 2H, *J* = 6.0, 1.5 Hz), 1.91 (m, 2H), 1.81 (m, 2H); <sup>13</sup>C NMR (75 MHz, CDCl<sub>3</sub>): δ<sub>C</sub> 168.0, 157.0, 148.2, 117.2, 115.4, 39.5, 29.3, 27.8, 23.9. HRMS (ESI<sup>+</sup>): Calcd. for M<sup>+</sup>: 227.9780, found: 227.9785 (97.3%), 229.9766 (100.0%).

<sup>1</sup>H NMR and <sup>13</sup>C NMR spectra of BBFs

Current Data Parameters  
 NAME SY-C-130b  
 EXPNO 1  
 PROCNO 1

F2 - Acquisition Parameters  
 Date\_ 20110908  
 Time 16.56

INSTRUM spect  
 PROBRD 5 mm QNP 1H/1  
 PULPROG zg  
 ID 32768  
 SOLVENT CDCl3  
 NS 48  
 DS 0  
 SWH 7485.030 Hz  
 FIDRES 0.228425 Hz  
 AQ 2.1889524 sec  
 RG 1625.5  
 DM 66.800 usec  
 DE 54.00 usec  
 TE 295.2 K  
 D1 2.00000000 sec  
 TDO 1

CHANNEL F1  
 NUCL1 1H  
 P1 6.75 usec  
 PL1 0.00 dB  
 SFO1 300.1306003 MHz

F2 - Processing Parameters  
 SI 32768  
 SF 300.1300035 MHz  
 WDW no  
 SSB 0  
 LB 0.00 Hz  
 GB 0  
 PC 1.00

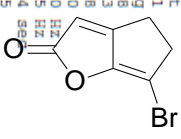

5-BBF

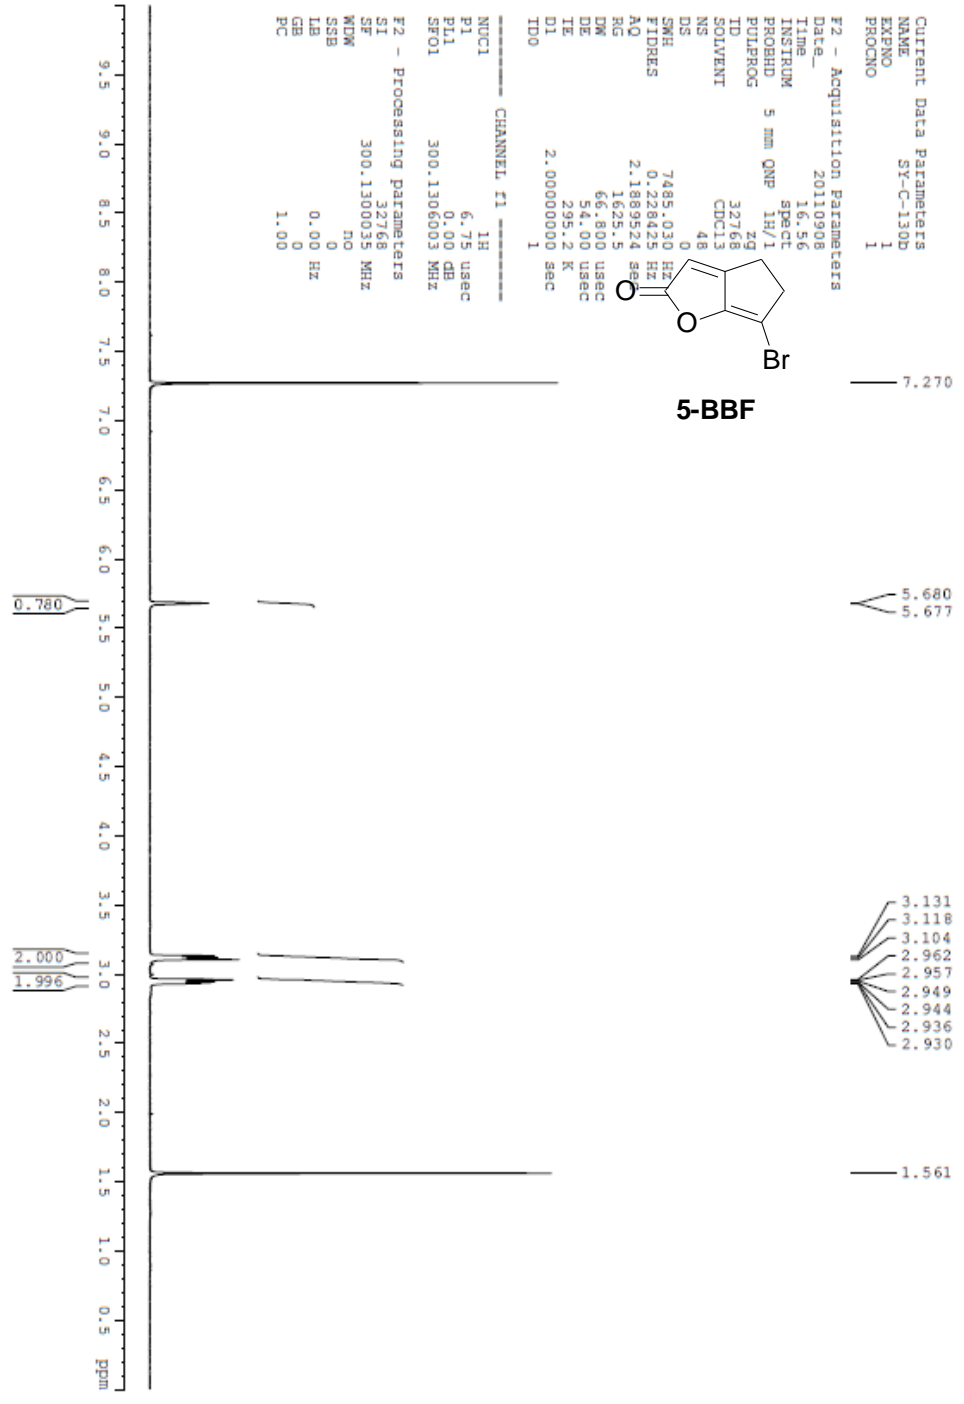



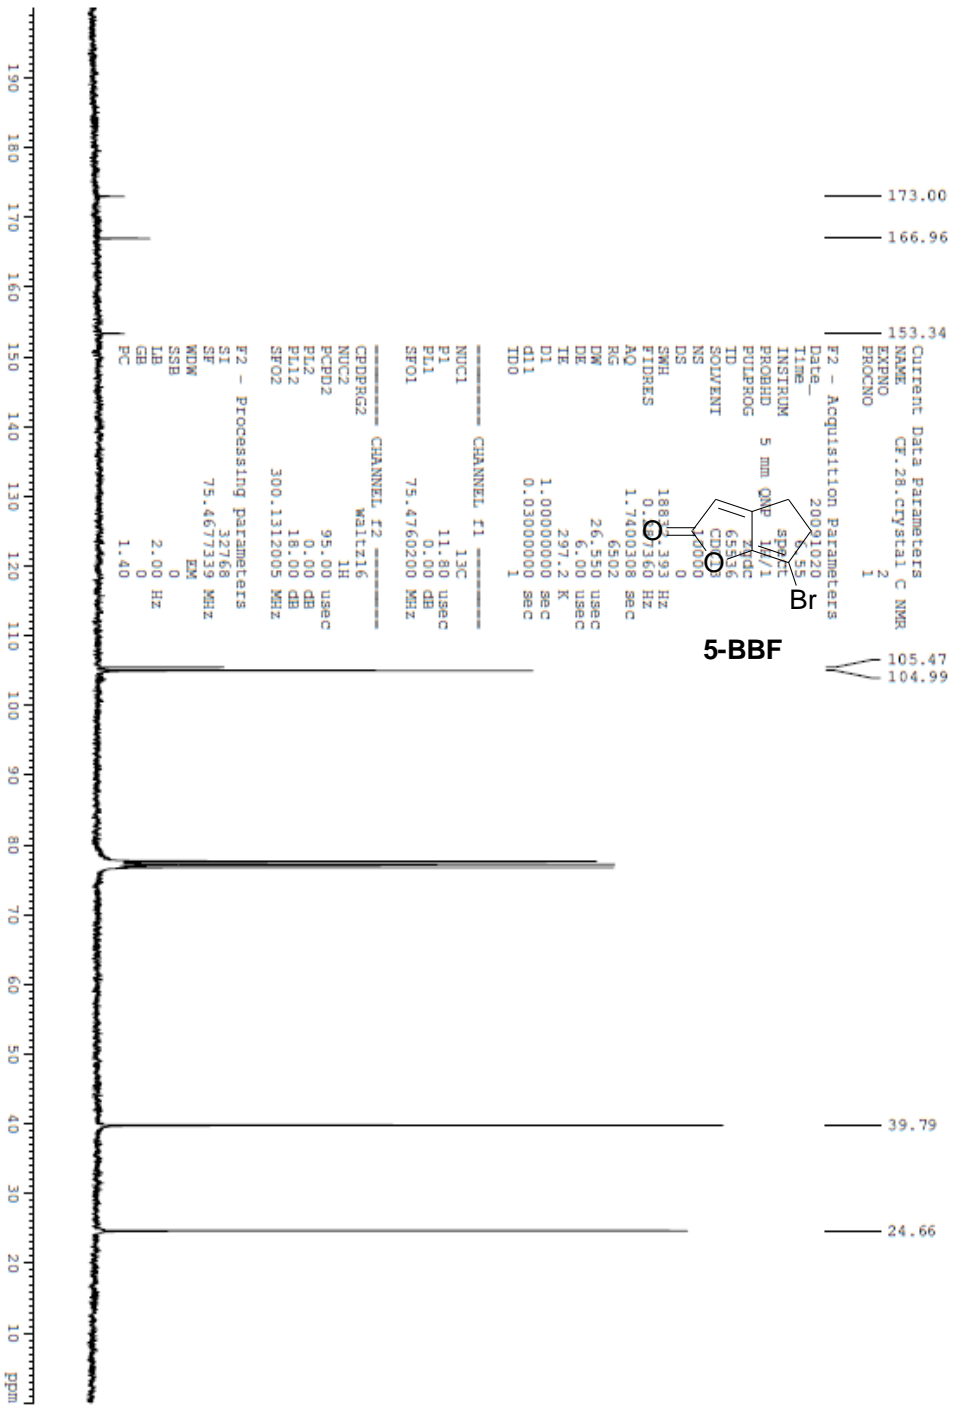



Current Data Parameters  
 NAME SV-D-8  
 EXPNO 1  
 PROCNO 1

F2 - Acquisition Parameters  
 Date\_ 2011019  
 Time 18.54  
 INSTRUM spect  
 PROBHD 5 mm QNP 1H/1  
 PULPROG zgpg30  
 TD 32768  
 SFO1 300.1306003 MHz  
 SOLVENT CDCl3  
 NS 1  
 DS 1  
 SWH 7485.038 Hz  
 FIDRES 0.228425 Hz  
 AQ 2.1889524 sec  
 RG 724.1  
 DW 66.800 usec  
 DE 54.90 usec  
 TE 294.2 K  
 D1 2.00000000 sec  
 ID0 1

CHANNEL f1  
 NUCl 1H  
 P1 6.75 usec  
 PL1 0.00 dB  
 SFO1 300.1306003 MHz

F2 - Processing parameters  
 SI 32768  
 SF 300.1300033 MHz  
 WDW no  
 SSB 0  
 GB 0  
 PC 1.00

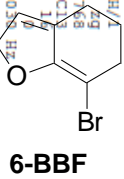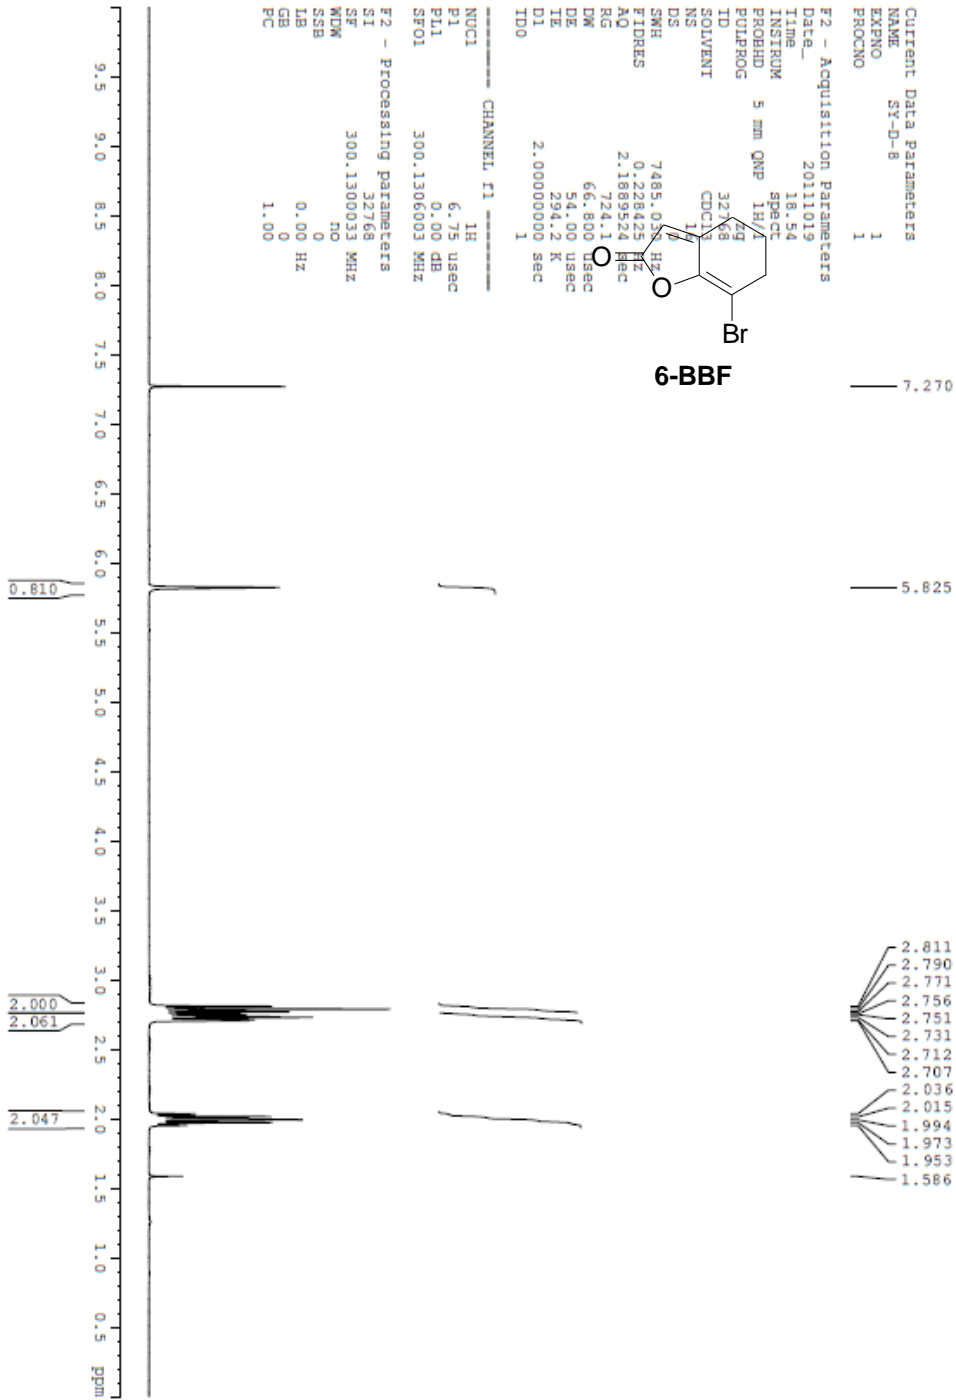

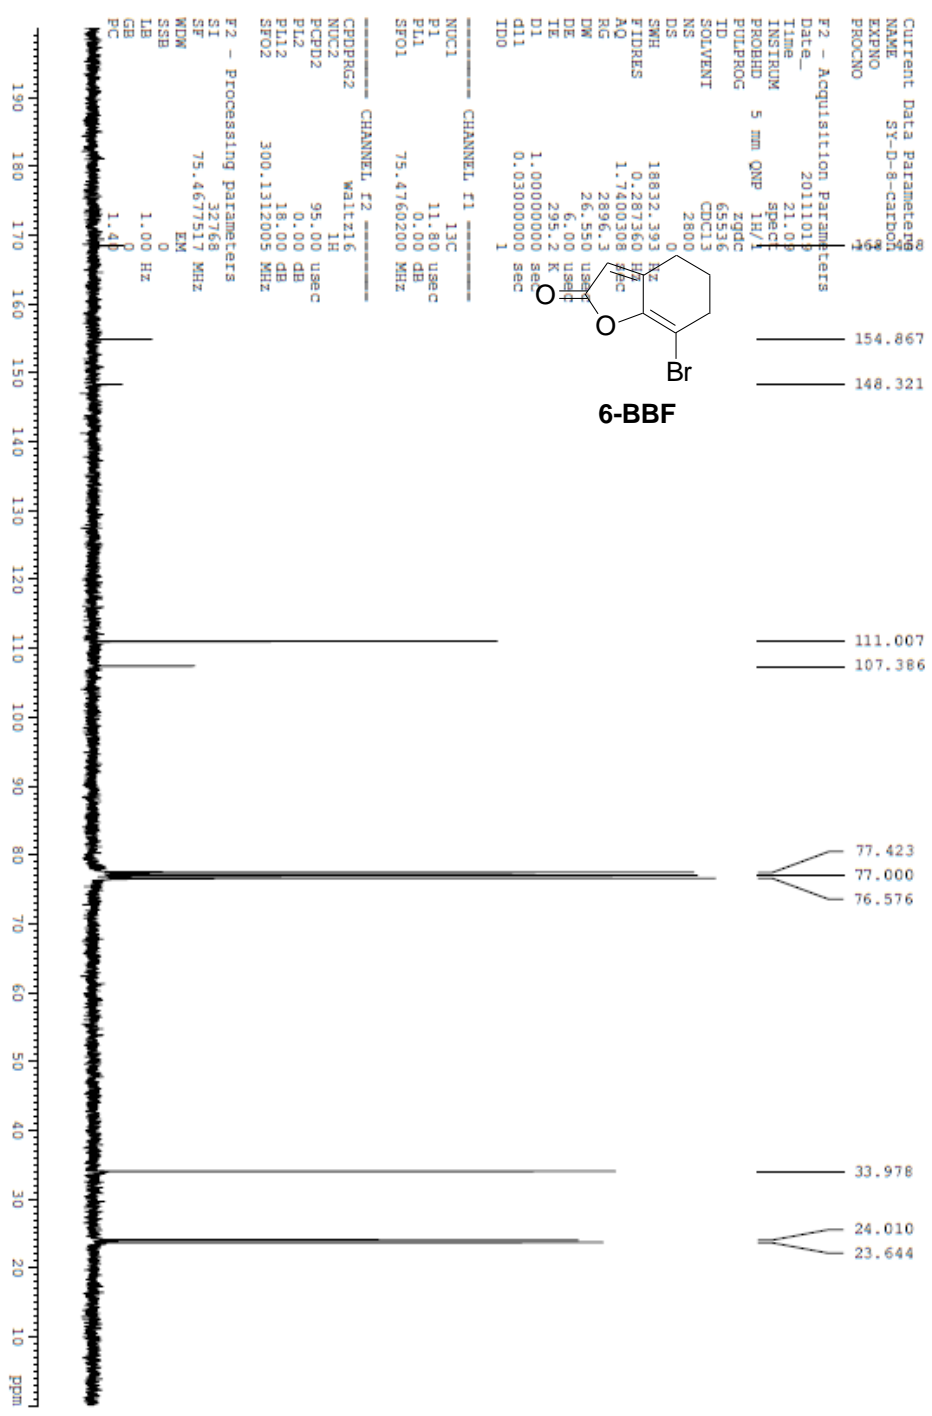

Current Data Parameters  
 NAME SY-D-4-7-member bicyclic-BF  
 EXPNO 1  
 PROCNO 1

F2 - Acquisition Parameters

Date\_ 20111018  
 Time 21.03  
 INSTRUM spect  
 PROBHD 5 mm QNP 1H/1  
 PULPROG zg  
 ID 32768  
 SOLVENT CDCl3  
 NS 16  
 DS 0  
 SWH 7485.030 HZ  
 FIDRES 0.228425 HZ  
 AQ 2.189524 sec  
 RG 456.1  
 DW 66.800 usec  
 DE 51.00 usec  
 TE 294.2 K  
 D1 2.00000000 sec  
 ID0

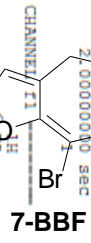

F2 - Processing Parameters

SI 32768  
 SF 300.1300032 MHz  
 WPM 70  
 SSB 0  
 LB 0.00 HZ  
 GB 0

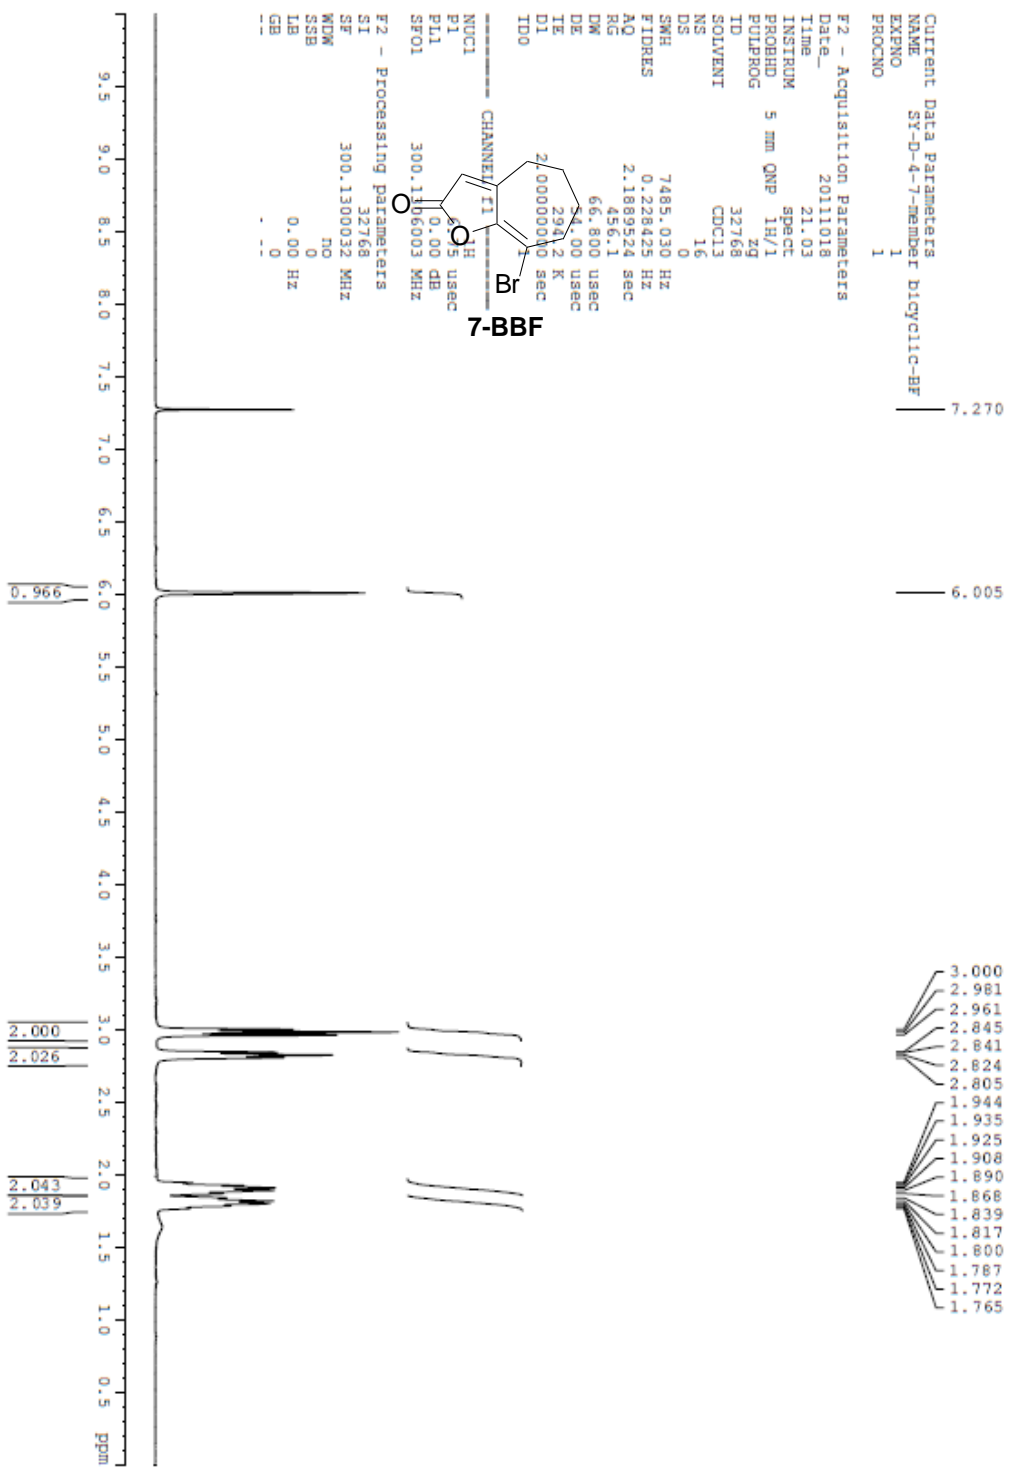

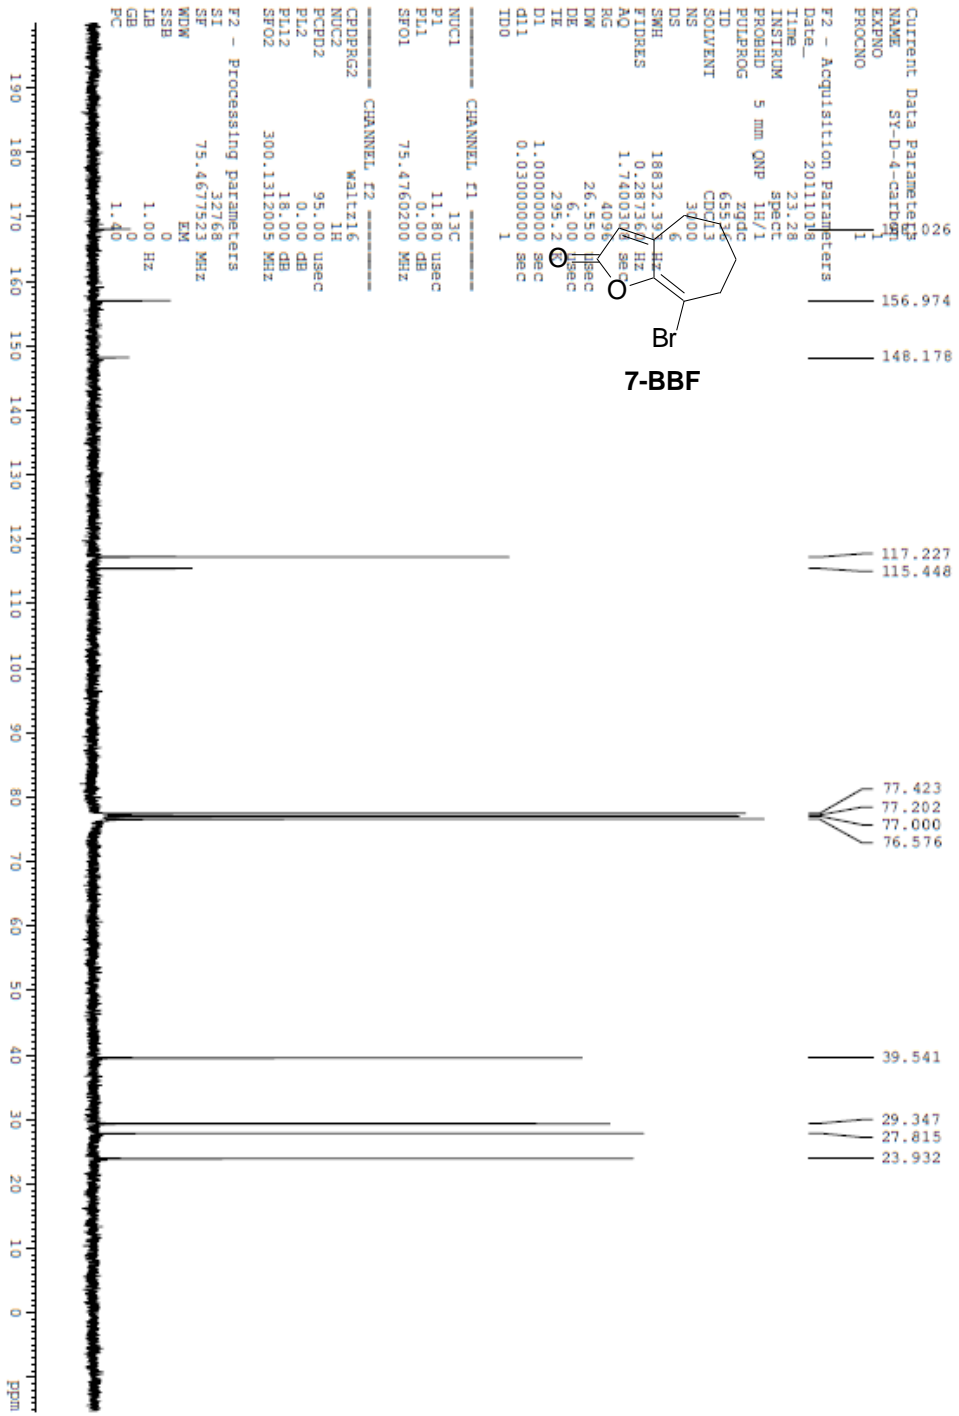

**Part 2: Biological activities study.**

Bacteria strains and Bacteria strains and growth media.

Double-knockout mutants of *Pseudomonas aeruginosa*, PAO-JP2 (*plasI*-LVAgfp) and PAO-JP2 (*prhII*-LVAgfp) were kindly provided by Dr. Helen E. Blackwell (University of Wisconsin-Madison) with permission by Dr. Babara H. Iglewski (University of Rochester Medical Center).<sup>2</sup> Plasmids *plasI*-LVAgfp and *prhII*-LVAgfp were kindly provided by Dr. Hiroaki Suga (The University of Tokyo).<sup>3</sup> *Escherichia coli* RP437 and *E. coli* RP437 with pRSH103 plasmid (constitutively expresses red fluorescence proteins) were kindly provided by Dr. Dacheng Ren (Syracuse University).<sup>4</sup> *E. coli* RP437 and *E. coli* RP437 (pRSH103) were grown in Luria-Bertani (LB) medium (containing 10 µg/mL of tetracycline for *E. coli* RP437 (pRSH103)) at 37 °C. *P. aeruginosa* PA01-BAA-47 (wild type) from ATCC and PA01-GFP (constitutively expresses green fluorescence proteins on plasmid pSMC2)<sup>5</sup> were grown in LB medium (containing 300 µg/mL of carbenicillin for PA01-GFP) at 37 °C. All the other *P. aeruginosa* strains were grown in M9 minimal medium containing 300 µg/mL of carbenicillin at 37 °C.

Stock solutions of brominated furanones

Stock solutions of all brominated furanones (BFs) were prepared in DMSO, sterilized by filtering through a 0.2 µm syringe filter, and stored at -20 °C in sealed vials. Appropriate amount of DMSO was added to controls in all assays to eliminate solvent effect. The amount of DMSO in all cases was no more than 0.8%.

Confocal laser scanning microscopy (CLSM) analysis of biofilms



Biofilms were grown on 316 stainless steel coupons (ca. 3/8 in. × 3/8 in., McMaster-Carr, Elmhurst, IL) with or without BBFs in a 24-well microplate. The plate was wrapped in a Saran wrap and incubated at 37 °C for 24 h without shaking. Each steel coupon was then washed gently by dipping into 0.9% NaCl saline buffer 3 times (fresh saline buffer was used for each dipping) and then placed upside down on a microscope cover glass (50 x 24mm, No. 2, Fisher Scientific, Pittsburgh, PA). The biofilms were visualized using a Zeiss LSM 710 Confocal Laser Scanning Microscope (Carl Zeiss, Jena, Germany). The biofilms formed by strain *E.coli* RP437 (pRSH103) were visualized by excitation with a HeNe laser at 543 nm and fluorescent emission was detected with a LP 560 nm emission filter. A 488 nm laser line was used to visualize biofilms formed by PA01-GFP. Z-stacks from four randomly picked spots were taken for each steel coupon. Quantification analysis of biomass, mean thickness, and surface area of the biofilms formed in the absence and presence of brominated furanones were obtained from fluorescence image using COMSTAT software.<sup>6</sup> Values are normalized by that of the BF-free control.

#### Crystal violet biofilm assay in 96-well plates

The protocol for biofilm assay employing crystal violet was adapted from literature with modification.<sup>7</sup> An overnight bacterial culture was subcultured at an optical density (OD<sub>600</sub>) of 0.1 in LB broth. Appropriate amount of stock solutions of BBFs in DMSO were added to each well. The outermost wells of the 96-well polystyrene microtiter plates (Costar 3370) were filled with 100 µL of sterile autoclaved water to prevent uneven evaporation. The plates were wrapped in Saran wrap and incubated under stationary conditions at 37 °C for 24 h. The media was then discarded and the plates were washed with deionized water (125 µL × 1) and dried for 30 min.

Biofilms were stained with 100  $\mu\text{L}$  of 0.1% aqueous solution of crystal violet for 30 min at room temperature. The crystal violet was discarded and then the plates were washed with deionized water ( $125 \mu\text{L} \times 3$ ) and dried again for 30 min. The remaining stained cells were solubilized with 200  $\mu\text{L}$  of 95% EtOH and 125  $\mu\text{L}$  of the solubilized CV stain was transferred to a new polystyrene microtiter dish. The amount of biofilm formation was determined by measure the absorbance at 540 nm. The relative biofilm formation was determined using the following equation: relative biofilm formation (%) =  $(A_{540} \text{ sample} - A_{540} \text{ medium}) / (A_{540} \text{ control} - A_{540} \text{ medium}) \times 100$ . The sample absorbance values were obtained from the wells containing bacteria and brominated furanones, and the control absorbance values were obtained from BF-free wells containing bacteria and DMSO.

#### Growth curve of planktonic bacteria

An overnight bacterial culture was diluted and grown to an  $\text{OD}_{600}$  of 0.05. The subculture was aliquoted into 96-well plates at 200  $\mu\text{L}$  per well. Appropriate amount of stock solutions of brominated furanones in DMSO was added to each well. The outermost wells of the 96-well plates were filled with 200  $\mu\text{L}$  of sterile autoclaved water to prevent uneven evaporation. The plates were incubated at 37  $^{\circ}\text{C}$  with shaking (250 rpm). The  $\text{OD}_{600}$  readings were acquired aseptically at 0, 2, 4, 6, 8, 10, 12, and 24 h, using Biotek ELx800 <sup>TM</sup> absorbance microplate reader (BioTek Instruments, Inc., Winooski, VT) and Gen5<sup>TM</sup> data analysis software. The growth curves were plotted as  $\text{OD}_{600}$  values (mean  $\pm$  SD) versus time from six replicates.

#### Reporter gene assay for *P. aeruginosa*

The protocols used for reporter gene assay was adapted from literature.<sup>8,9</sup> An overnight culture of PA01 (*plasI*-LVAgfp) and PA01 (*prhII*-LVAgfp) in M9 medium (300 µg/mL carbenicillin) was grown from a single colony picked from an LB agar plate supplemented with 300 µg/mL carbenicillin. The cell culture was diluted and grew to an OD<sub>600</sub> of 0.1 in M9 medium containing 300 µg/mL of carbenicillin. Bacteria culture (200 µL) was added to each well of a polystyrene 96-well microplate (Costar 3370, Corning Incorporated, Corning, NY) containing appropriate amount of natural autoinducers with and without brominated furanones. The plate was incubated at 37 °C for 24 h in a rotary shaking incubator (250 rpm). The culture from each well was then transferred to a 96-well plate with black wall (µClear, 655096, Greiner Bio-One North America, Inc., Monroe, NC). The fluorescence (an excitation wavelength of 500 nm and an emission wavelength of 540 nm) and OD absorbance (OD<sub>600</sub>) in each well was measured by Synergy 2 multi-mode microplate reader with a Gen5 data analysis software. Background signals from M9 medium were deducted from all samples.

#### Production of elastase B

The production of virulence factor elastase B by *P. aeruginosa* was measured as described previously.<sup>10,11</sup> Bacteria were grown overnight in PTSB media (5% Peptone, 0.1% Tryptic Soy Broth) at 37 °C, diluted and grown to midlog phase, and subcultured to an OD<sub>600</sub> of 0.05. The culture was then added to test tubes containing BBFs at the desired final concentrations. The tubes were incubated for 24 h at 37 °C with shaking (250 rpm). Culture supernatants were recovered by centrifugation at 3000 rpm (Galaxy 5D centrifuge, VWR, Radnor, PA) for 10 min at room temperature and then passed through a 0.45 µm PVDF syringe filter (Santa Cruz Biotechnology, Inc., Santa Cruz, CA). A 100 µL aliquot of the supernatant was added to 900

$\mu\text{L}$  of Elastin-Congo red (ECR) buffer (100 mM Tris-HCl, 1 mM  $\text{CaCl}_2$ , pH 7.2) containing 4.5 mg of Elastin-Congo red and incubated for 24 h at 37 °C with shaking (250 rpm). After incubation, 0.2 mL of 0.12 M EDTA was added to stop the reaction. Insoluble ECR was removed by centrifugation and the absorbance of the supernatant ( $A_{490}$ ) was measured. Elastase B activity was represented by  $A_{490}$  of the samples treated with BBFs minus the  $A_{490}$  of the bacteria-free samples.

#### Cytotoxicity assay for human cells

All cell cultures were maintained in a humidified incubator, at 37 °C, with 5%  $\text{CO}_2$  atmosphere. Human neuroblastoma SK-N-SH cells (a donation from Bonnie B. Toms at SUNY Upstate Medical University) were cultured in 96-well plates with 100  $\mu\text{L}$  of culture medium (EMEM + 10% FBS, 100  $\mu\text{g}/\text{mL}$  streptomycin, 100 IU/mL penicillin, and 2.0 mM L-glutamine). Each well contained 100  $\mu\text{L}$  of cell suspension with a concentration of  $5 \times 10^4$  cells/mL. The viability of SK-N-SH was determined with a hemacytometer using standard trypan blue protocol. For cytotoxicity assay, the colorimetric cell counting assay (CCK 8 assay) was used as described previously.<sup>12</sup> In brief, after being plated, the SK-N-SH cells were allowed to adhere to the bottom of the wells for 24 h. The medium was then replaced with fresh ones (supplemented with DMSO to eliminate solvent effect for the negative control) with or without brominated furanones. After 1 h, the BF-containing media were removed and the cells were washed twice with fresh culture medium without DMSO. The cells were then allowed to recover for 0, 24, and 48 h (recovery time), at which time the number of live cells was determined by the CCK 8 assay.<sup>12</sup> The survival (%) was calculated using the equation: survival (%) =  $(A_{450} \text{ sample} - A_{450} \text{ medium}) / (A_{450} \text{ control} - A_{450} \text{ medium}) \times 100$ . The sample

absorbance values were obtained from the wells containing cells and brominated furanones, and the control absorbance were obtained from BF-free wells containing cells and DMSO.

### Statistical analysis

Experimental data were analyzed by SigmaStat 3.5 software (Systat Software, Inc., San Jose, CA) and presented as means  $\pm$  standard error. Two-group comparisons were performed using Student's *t* test. A *P* value of  $<0.05$  was considered to be statistically significant.

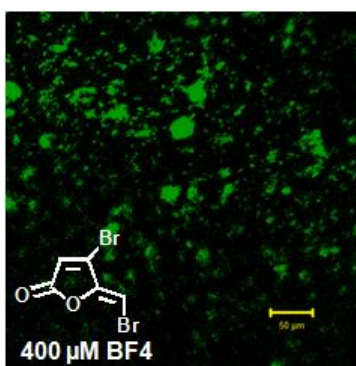

**Fig S1.** Effect of 400  $\mu\text{M}$  **BF4** on biofilm formation by *P. aeruginosa* strain PA01-GFP. Representative confocal laser scan microscopy (CLSM) image of biofilm formed by PA01-GFP (expresses green fluorescence on plasmid pSMC2) in the presence of 400  $\mu\text{M}$  **BF4**. Scale bar = 50  $\mu\text{m}$ .

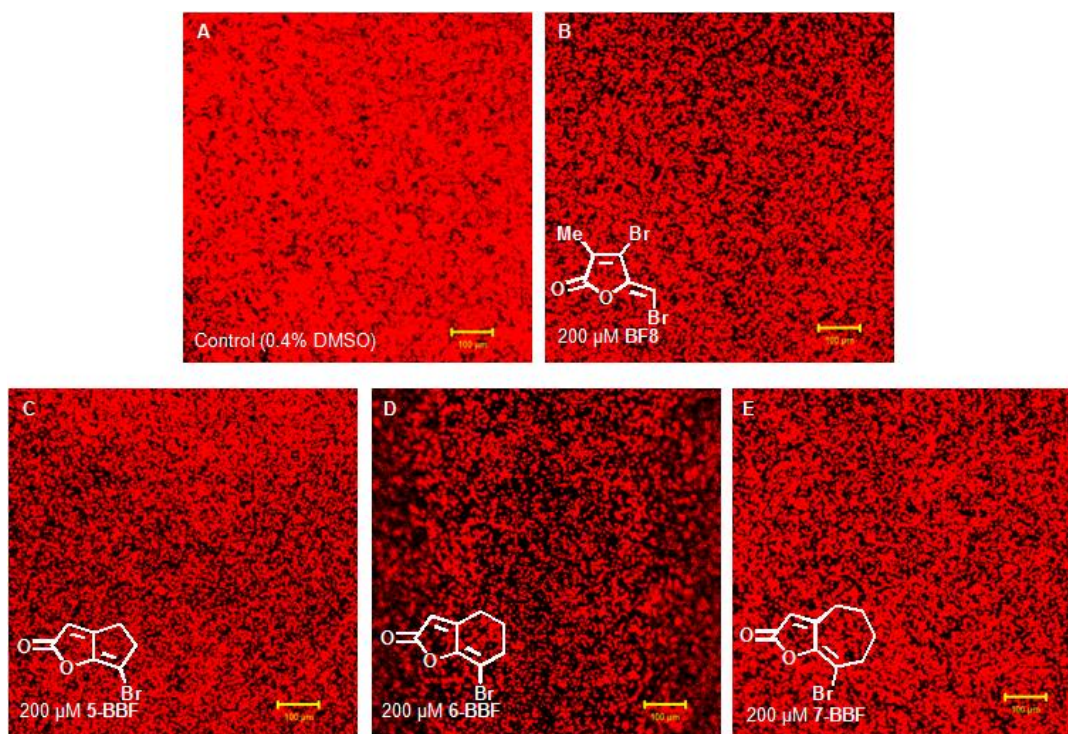

**Fig S2.** Effect of brominated furanones on biofilm formation by *E.coli* RP437 (pRSH103). Representative confocal laser scanning microscopy (CLSM) images of biofilm formed by *E.coli* RP437 (pRSH103) in the absence (A) and presence of 200  $\mu$ M **BF8** (B), **5-BBF** (C), **6-BBF** (D) and **7-BBF** (E). The control is supplemented with the same amount (0.4%) of DMSO as present in the brominated furanone-treated conditions. Scale bar = 100  $\mu$ m.

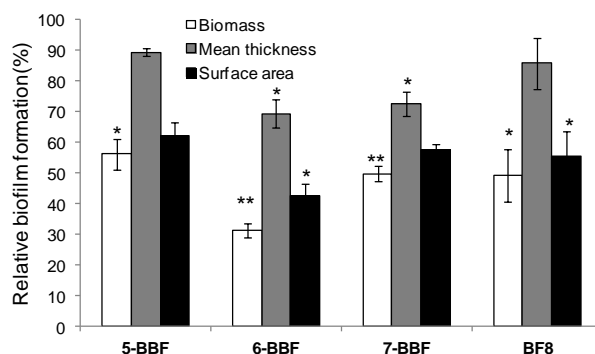

**Fig S3.** Quantification of biofilm formation by *E.coli* RP437 (pRSH103) in the absence and presence of 200  $\mu$ M brominated furanones. Biomass, mean thickness, and surface area were quantified from fluorescence image using COMSTAT software.<sup>6</sup> Z-Stack images from four different locations were used. Values are normalized by that of the BF-free control and represent the means  $\pm$  standard deviation from 4 replicates. Significant differences in the biofilm formation with the BF-free control are indicated by asterisks: \*,  $P < 0.05$ ; \*\*,  $P < 0.01$ .

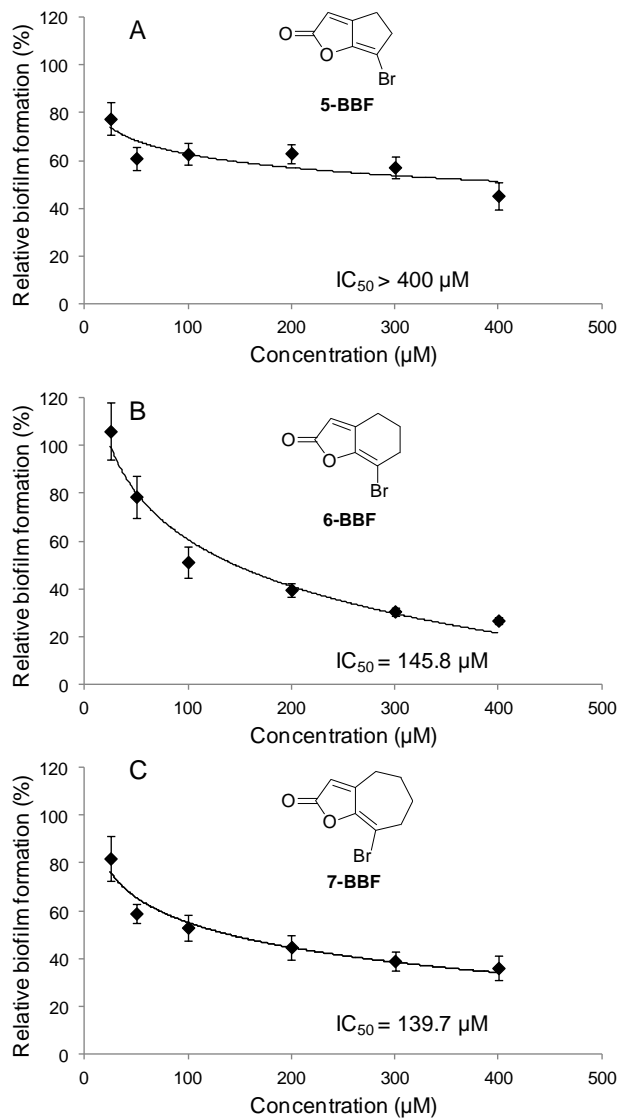

**Fig S4.** *P. aeruginosa* biofilm formation dose-response curves with  $\text{IC}_{50}$  values for (A) **5-BBF**, (B) **6-BBF**, and (C) **7-BBF**. Values represent means  $\pm$  standard deviation from 4 replicates. Data shown is a representative of at least three separate experiments.

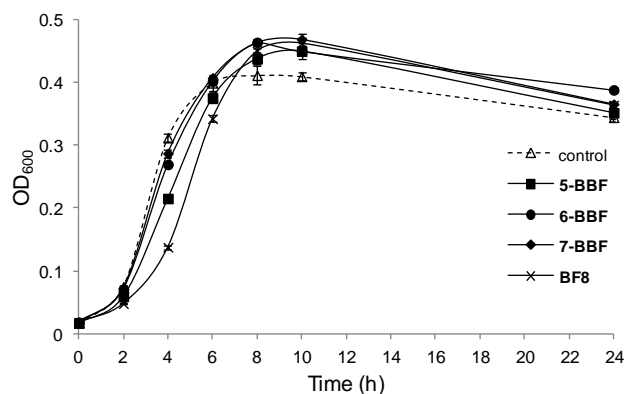

**Fig S5.** Effect of 200  $\mu\text{M}$  BBFs or **BF8** on the growth of *E. coli* RP437. Growth curve of *E. coli* RP437 in the absence and presence of 200  $\mu\text{M}$  brominated furanones. Values are normalized by that of the BF-free control and represent the means  $\pm$  standard deviation from 6 replicates. Data shown is a representative of at least three separate experiments.

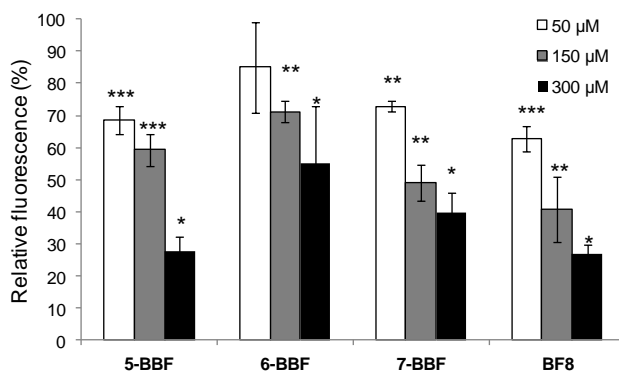

**Fig S6.** GFP expression by PAO-JP2 (*plasI-LVAgfp*) in the presence of 1  $\mu\text{M}$  3-oxo-C12-HSL alone (control) or 1  $\mu\text{M}$  3-oxo-C12-HSL plus various concentration of **5-BBF**, **6-BBF**, **7-BBF**, or **BF8**. Fluorescence signals were corrected for cell density by dividing by  $\text{OD}_{600}$  of cell culture and the results were normalized to the BF-free control. Values represent the means  $\pm$  standard deviation from four replicates. Data shown is a representative of duplicate experiments. Significant differences in the GFP expression with the control are indicated by asterisks: \*,  $P < 0.05$ ; \*\*,  $P < 0.01$ ; \*\*\*,  $P < 0.001$ .



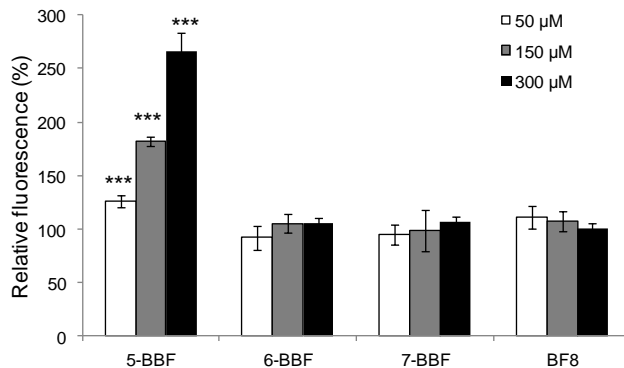

**Fig S7.** GFP expression by PA01 (*prhII-LVAgfp*) in the absence or presence of **5-BBF**, **6-BBF**, **7-BBF**, or **BF8** at 50, 150, and 300  $\mu$ M. Fluorescence signals were corrected for cell density by dividing by  $OD_{600}$  of cell culture and the results were normalized to the BF-free control. Values represent the means  $\pm$  standard deviation from four replicates. Data shown is a representative of at least three separate experiments. Significant differences in the GFP expression with the control are indicated by asterisks: \*\*\*,  $P < 0.001$ .

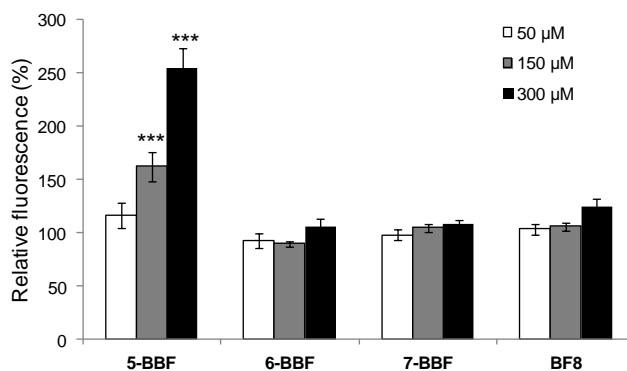

**Fig S8.** GFP expression by PAO-JP2 (*prhII-LVAgfp*) in the presence of 1  $\mu$ M 3-oxo-C12-HSL and 10  $\mu$ M C4-HSL alone (control) or 1  $\mu$ M 3-oxo-C12-HSL and 10  $\mu$ M C4-HSL plus various concentrations of **5-BBF**, **6-BBF**, **7-BBF**, or **BF8**. Fluorescence signals were corrected for cell density by dividing by  $OD_{600}$  of cell culture and the results were normalized to the BF-free control. Values represent the means  $\pm$  standard deviation from four replicates. Data shown is a representative of at least three separate experiments. Significant differences in the GFP expression with the control are indicated by asterisks: \*\*\*,  $P < 0.001$ .

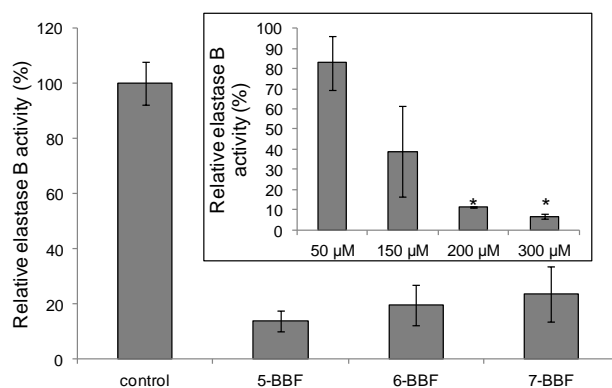

**Fig S9.** Effects of BBFs on the expression of elastase B by *P. aeruginosa* PAO-JP2. Elastase B activity produced by *P. aeruginosa* PAO-JP2 in the presence of 5  $\mu\text{M}$  3-oxo-C12-HSL and 10  $\mu\text{M}$  C4-HSL alone (control) or 5  $\mu\text{M}$  3-oxo-C12-HSL and 10  $\mu\text{M}$  C4-HSL plus 300  $\mu\text{M}$  BBFs or 5  $\mu\text{M}$  3-oxo-C12-HSL and 10  $\mu\text{M}$  C4-HSL plus various concentration of **6-BBF** (insert). Values were normalized to that of the BF-free control and represent the means  $\pm$  standard deviation from four replicates. Data shown is a representative of at least three separate experiments. Significant differences in the elastase B activity with the control are indicated by asterisks: \*,  $P < 0.05$ .

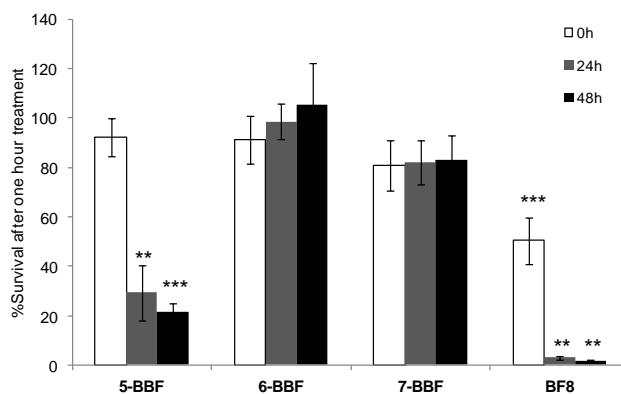

**Fig S10.** Survival (%) of human neuroblastoma SK-N-SH cells at 0, 24, and 48 h after 1 h treatment of 100  $\mu\text{M}$  **5-BBF**, **6-BBF**, **7-BBF** and **BF8**, respectively. Values represent the means  $\pm$  standard deviation. Data shown is a representative of duplicate experiments. Significant differences in the survival% with BF-free control are indicated by asterisks: \*\*,  $P < 0.01$ ; \*\*\*,  $P < 0.001$ .

## References

1. C. A. Holloway, M. E. Muratore, R. I. Storer and D. J. Dixon, *Org Lett*, 2010, **12**, 4720-4723.
2. E. Pesci, J. P. Pearson, P. C. Seed and B. H. Iglewski, *J Bacteriol*, 1997, **179**, 3127-3132.

3. T. R. De Kievit, R. Gillis, S. Marx, C. Brown and B. H. Iglewski, *Appl Environ Microbiol*, 2001, **67**, 1865-1873.
4. Y. Han, S. Hou, K. A. Simon, D. Ren and Y.-Y. Luk, *Bioorg Med Chem Lett*, 2008, **18**, 1006-1010.
5. G. V. Bloemberg, G. A. O'Toole, B. J. J. Lugtenberg and R. Kolter, *Appl Environ Microbiol*, 1997, **63**, 4543-4551.
6. A. Heydorn, A. T. Nielsen, M. Hentzer, C. Sternberg, M. Givskov, B. K. Ersboll and S. Molin, *Microbiology*, 2000, **146**, 2395-2407.
7. R. W. Huigens, III, J. J. Richards, G. Parise, T. E. Ballard, W. Zeng, R. Deora and C. Melander, *Journal of the American Chemical Society*, 2007, **129**, 6966-6967.
8. G. D. Geske, R. J. Wezeman, A. P. Siegel and H. E. Blackwell, *Journal of the American Chemical Society*, 2005, **127**, 12762-12763.
9. R. Frei, A. S. Breitbach and H. E. Blackwell, *Angew. Chem. Int. Ed.*, 2012, **51**, 5226-5229.
10. M. W. Calfee, J. P. Coleman and E. C. Pesci, *Proc Natl Acad Sci U S A*, 2001, **98**, 11633-11637.
11. K. M. Smith, Y. Bu and H. Suga, *Chem. Biol.*, 2003, **10**, 81-89.
12. M. Ishiyama, H. Tominaga, M. Shiga, K. Sasamoto, Y. Ohkura and K. Ueno, *Biol Pharm Bull*, 1996, **19**, 1518-1520.
